# Supplementary material for: Health related quality of life in patients with end stage kidney disease treated with haemodialysis in Malawi: a cross sectional study
Source: Springer Nature journal article supplement (doi:10.1186/s12882-016-0292-9), 2016-07-07
Supplement: MOESM2 [file 10348858]

**KIDNEY DISEASE AND QUALITY OF LIFE  
SHORT FORM QUESTIONNAIRE  
(KDQOL-SF™)**

*Hays, R.D., Kallich, J.D., Mapes, D.L., Coons, S.J., Amin, N., & Carter, W.B. (1995) Kidney Disease Quality of Life Short Form (KDQOL-SF™), Version 1.3: A Manual for Use and Scoring. Santa Monica, CA: RAND, P-7994*

**INSTRUCTIONS FOR FILLING OUT SURVEY**

1. This survey asks for your views about your health. This information will help keep track of how you feel and how well you are able to do your usual activities.
2. This survey includes a wide variety of questions about your health and your life. We are interested in how you feel about each of these issues.
3. Please answer the questions by circling the appropriate number or by filling in the answer as requested.
4. Several items in the survey ask about the effects of kidney disease on your life. Some items will ask about limitations related to your kidney disease, and some items will ask about your well-being. Some questions may look like others, but each one is different. Please answer every question as honestly as possible. If you are unsure about how to answer a question, please give the best answer you can. This will allow us to have an accurate picture of the different experiences of individuals with kidney disease.

## YOUR HEALTH

1. In general, would you say your health is:

Unchecked  Excellent  Very good  Good  Fair  Poor

2. **Compared to one year ago**, how would you rate your health in general **now**?

- Unchecked
- Much better now than one year ago
- Somewhat better now than one year ago
- About the same as one year ago
- Somewhat worse than one year ago
- Much worse now than one year ago

3. The following items are about activities you might do during a typical day. **Does your health now limit** you in these activities? If so, how much?

a. **Vigorous activities**, such as running, lifting heavy objects, participating in strenuous sports

Unchecked  yes, limited a Lot  yes, limited a little  No, not limited at all

b. **Moderate activities**, such as moving a table, mopping and sweeping

Unchecked  yes, limited a Lot  yes, limited a little  No, not limited at all

c. Lifting or carrying groceries

Unchecked  yes, limited a Lot  yes, limited a little  No, not limited at all

d. Climbing **several** flights of stairs

Unchecked  yes, limited a Lot  yes, limited a little  No, not limited at all

e. Climbing **one** flight of stairs

Unchecked  yes, limited a Lot  yes, limited a little  No, not limited at all

f. Bending, kneeling or stooping

Unchecked  yes, limited a Lot  yes, limited a little  No, not limited at all

- g. Walking **more than a kilometer**,  
 Unchecked  yes, limited a Lot  yes, limited a little  No, not limited at all
- h. Walking **several blocks**  
 Unchecked  yes, limited a Lot  yes, limited a little  No, not limited at all
- i. Walking **one block**  
 Unchecked  yes, limited a Lot  yes, limited a little  No, not limited at all
- j. Bathing or dressing yourself  
 Unchecked  yes, limited a Lot  yes, limited a little  No, not limited at all

4. During the **past four weeks**, have you had any of the following problems with your work or other regular activities **as a result of your physical health**?

- a. Cut down the **amount of time** you spend on work on other activities?  
 Unchecked  Yes  No
- b. **Accomplished less** than you would have liked?  
 Unchecked  Yes  No
- c. Were limited in the **kind** of work or other activities?  
 Unchecked  Yes  No
- d. Had **difficulty** performing the work or other activities (for example, it took extra effort)?  
 Unchecked  Yes  No

5. During the **past four weeks**, have you had any of the following problems with your work or other regular daily activities **as a result of any emotion problems** (such as feeling depressed or anxious)?

- a. Cut down the **amount of time** you spend on work on other activities?  
 Unchecked  Yes  No
- b. **Accomplished less** than you would have liked?  
 Unchecked  Yes  No
- c. Didn't do work or other activities **kind** as carefully as usual?  
 Unchecked  Yes  No

6. During the **past four weeks**, to what **extent** have your **physical health or emotion problems** interfered with your normal social activities with family, friends, neighbours, or groups?

Unchecked  Not at all  Slightly  Moderately  Quite a bit  Extremely

7. How much **bodily** pain have you had during the **past four weeks**?

Unchecked  None  Very mild  Mild  Moderate  Severe  Very severe

8. During the **past four weeks**, how much did **pain** interfere with your normal work (including work outside the home and housework)?

Unchecked  Not at all  Slightly  Moderately  Quite a bit  Extremely

9. These questions are about how you feel and how things have been with you during the past 4 weeks. For each question, please give the one answer that comes closest to the way you have been feeling.

How much of the time during the past 4 weeks

a. Did you feel high spirited?

Unchecked  All of the time  Most of the time  A good bit of the time   
Some of the time  A little of the time  None of the time

b. Have you been a very nervous person?

Unchecked  All of the time  Most of the time  A good bit of the time   
Some of the time  A little of the time  None of the time

c. Have you felt so down in the dumps that nothing could cheer you up?

Unchecked  All of the time  Most of the time  A good bit of the time   
Some of the time  A little of the time  None of the time

d. Have you felt calm and peaceful?

Unchecked  All of the time  Most of the time  A good bit of the time   
Some of the time  A little of the time  None of the time

e. Did you have a lot of energy?

Unchecked  All of the time  Most of the time  A good bit of the time   
Some of the time  A little of the time  None of the time

f. Have you felt downhearted and blue?

Unchecked  All of the time  Most of the time  A good bit of the time   
Some of the time  A little of the time  None of the time

g. Did you feel worn out?

Unchecked  All of the time  Most of the time  A good bit of the time   
Some of the time  A little of the time  None of the time

h. Have you been a happy person?

Unchecked  All of the time  Most of the time  A good bit of the time   
Some of the time  A little of the time  None of the time

i. Did you feel tired

Unchecked  All of the time  Most of the time  A good bit of the time   
Some of the time  A little of the time  None of the time

10. During past 4 weeks, how much of the time have your physical health or emotional problems interfered with your social activities?

Unchecked  All of the time  Most of the time  Some of the time  A little of the time   
None of the time

11. Please choose the answer that best describes how TRUE or FALSE each of the following statements is for you.

a. I seem to get sick a little easier than other people

Unchecked  Definitely True  Mostly True  Don't Know  Mostly False   
Always False

b. I am as healthy as anybody I know

Unchecked  Definitely True  Mostly True  Don't Know  Mostly False   
Always False

- c. I expect my health to get worse  
 Unchecked  Definitely True  Mostly True  Don't Know  Mostly False  
 Always False
- d. My health is excellent  
 Unchecked  Definitely True  Mostly True  Don't Know  Mostly False  
 Always False

## YOUR KIDNEY DISEASE

12. How TRUE or FALSE is each of the following statements for you?

- a. My kidney disease interferes too much with my life  
 Unchecked  Definitely True  Mostly True  Don't Know  Mostly False  
 Always False
- b. Too much time is spent dealing with my kidney disease  
 Unchecked  Definitely True  Mostly True  Don't Know  Mostly False  
 Always False
- c. I feel frustrated dealing with my kidney disease  
 Unchecked  Definitely True  Mostly True  Don't Know  Mostly False  
 Always False
- d. I feel like a burden on my family  
 Unchecked  Definitely True  Mostly True  Don't Know  Mostly False  
 Always False

13. These questions are about how you feel and how things have been going during the past 4 weeks. For each question, please give the one answer that comes closest to the way you have been feeling? how much of the time

- a. Did you isolate yourself from people around you ?  
 Unchecked  None of the Time  A Little of the Time  Some of the Time  A  
 Good bit of the Time  Most of the Time  All of the Time
- b. Did you react slowly to things that were said or done?  
 Unchecked  None of the Time  A Little of the Time  Some of the Time  A  
 Good bit of the Time  Most of the Time  All of the Time

c. Did you act irritable toward those around you?

Unchecked  None of the Time  A Little of the Time  Some of the Time  A  
Good bit of the Time  Most of the Time  All of the Time

d. Did you have difficulty concentrating or thinking?

Unchecked  None of the Time  A Little of the Time  Some of the Time  A  
Good bit of the Time  Most of the Time  All of the Time

e. Did you get along well with other people?

Unchecked  None of the Time  A Little of the Time  Some of the Time  A  
Good bit of the Time  Most of the Time  All of the Time

f. Did you become confused?

Unchecked  None of the Time  A Little of the Time  Some of the Time  A  
Good bit of the Time  Most of the Time  All of the Time

14. During the past 4 weeks, to what extent were you bothered by each of the following?

a. Soreness in your muscles?

Unchecked  Not at all bothered  Somewhat bothered  Moderately bothered  
 Very Much Bothered  Extremely Bothered

b. Chest pain?

Unchecked  Not at all bothered  Somewhat bothered  Moderately bothered  
 Very Much Bothered  Extremely Bothered

c. Cramps?

Unchecked  Not at all bothered  Somewhat bothered  Moderately bothered  
 Very Much Bothered  Extremely Bothered

d. Itchy skin?

Unchecked  Not at all bothered  Somewhat bothered  Moderately bothered  
 Very Much Bothered  Extremely Bothered

e. Dry skin?

Unchecked  Not at all bothered  Somewhat bothered  Moderately bothered  
 Very Much Bothered  Extremely Bothered

f. Shortness of breath?

Unchecked  Not at all bothered  Somewhat bothered  Moderately bothered  
 Very Much Bothered  Extremely Bothered

g. Faintness or dizziness?

Unchecked  Not at all bothered  Somewhat bothered  Moderately bothered  
 Very Much Bothered  Extremely Bothered

h. Lack of appetite?

Unchecked  Not at all bothered  Somewhat bothered  Moderately bothered  
 Very Much Bothered  Extremely Bothered

i. Washed out or drained?

Unchecked  Not at all bothered  Somewhat bothered  Moderately bothered  
 Very Much Bothered  Extremely Bothered

j. Numbness in hands or feet?

Unchecked  Not at all bothered  Somewhat bothered  Moderately bothered  
 Very Much Bothered  Extremely Bothered

k. Nausea or upset stomach?

Unchecked  Not at all bothered  Somewhat bothered  Moderately bothered  
 Very Much Bothered  Extremely Bothered

l. Problems with your access site (hemo only) ?

Unchecked  Not at all bothered  Somewhat bothered  Moderately bothered  
 Very Much Bothered  Extremely Bothered



## EFFECTS OF KIDNEY DISEASE ON YOUR DAILY LIFE

15. Some people are bothered by the effects of kidney disease on their daily life, while others are not. How much does kidney disease bother you in each of the following areas?

a. Fluid restrictions?

Unchecked  Not at all bothered  Somewhat bothered  Moderately bothered  
 Very Much Bothered  Extremely Bothered

b. Dietary restrictions?

Unchecked  Not at all bothered  Somewhat bothered  Moderately bothered  
 Very Much Bothered  Extremely Bothered

c. Your ability to work around the house?

Unchecked  Not at all bothered  Somewhat bothered  Moderately bothered  
 Very Much Bothered  Extremely Bothered

d. Your ability to travel?

Unchecked  Not at all bothered  Somewhat bothered  Moderately bothered  
 Very Much Bothered  Extremely Bothered

e. Being dependent on doctors and other medical staff?

Unchecked  Not at all bothered  Somewhat bothered  Moderately bothered  
 Very Much Bothered  Extremely Bothered

f. Stress or worries caused by kidney disease?

Unchecked  Not at all bothered  Somewhat bothered  Moderately bothered  
 Very Much Bothered  Extremely Bothered

g. Your sex life?

Unchecked  Not at all bothered  Somewhat bothered  Moderately bothered  
 Very Much Bothered  Extremely Bothered

h. Your personal appearance?

Unchecked  Not at all bothered  Somewhat bothered  Moderately bothered  
 Very Much Bothered  Extremely Bothered

**The next three questions are personal and relate to your sexual activity, but your answers are important in understanding how kidney disease impacts on people's lives.**

16. Have you had sexual activity in the past 4 weeks? (If "No" Please skip to Question 30)

Unchecked  Yes  No

a. Enjoying sex?

Unchecked  Not a Problem  A Little Problem  Somewhat of a Problem  
 Very Much a Problem  Severe Problem

b. Becoming sexually aroused?

Unchecked  Not a Problem  A Little Problem  Somewhat of a Problem  
 Very Much a Problem  Severe Problem

**For the following question, please rate your sleep using a scale ranging from 0 representing "very bad" to 10 representing "very good".**

**If you think your sleep is half-way between "very bad" and "very good," please circle 5. If you think your sleep is one level better than 5, circle 6. If you think your sleep is one level worse than 5, circle 4 (and so on)**

17. On a scale from **0** to**10**, how would you rate your sleep overall?

Unchecked  Very Bad 0  1  2  3  4  5  6  7  8  9   
Very Good 10

18. How often during the past 4 weeks did you

a. Awaken during the night and have trouble falling asleep again?

Unchecked  None of the Time  A Little of the Time  Some of the Time  
 A Good bit of the Time  Most of the Time  All of the Time

b. Get the amount of sleep you need?

Unchecked  None of the Time  A Little of the Time  Some of the Time  
 A Good bit of the Time  Most of the Time  All of the Time

c. Have trouble staying awake during the day?

Unchecked  None of the Time  A Little of the Time  Some of the Time  
 A Good bit of the Time  Most of the Time  All of the Time

19. Concerning your family and friends, how satisfied are you with

a. The amount of time you are able to spend with your family and friends?

Unchecked  Very dissatisfied  Somewhat dissatisfied  Somewhat satisfied  
 Very satisfied

b. The support you receive from your family and friends?

Unchecked  Very dissatisfied  Somewhat dissatisfied  Somewhat satisfied  
 Very satisfied

20. During the past 4 weeks, did you work at a paying job?

Unchecked  Yes  No

21. Does your health keep you from working at a paying job?

Unchecked  Yes  No

22. Overall, how would you rate your health?

Worst possible (as bad or worse than being dead)  Unchecked  1  2  3  4  
 5 Half-way between worst and best  6  7  8  9  Best possible health 10

#### SATISFACTION WITH CARE- FOR PATIENTS ON HAEMODIALYSIS ONLY

23. Think about the care you receive for kidney dialysis. In terms of your satisfaction, how would you rate the friendliness and interest shown in you as a person? Unchecked  Very

Poor  Poor

Fair  Good  Very Good  Excellent  The Best

24. How TRUE or FALSE is each of the following statements?

a. Dialysis staff encourage me to be as independent as possible

Unchecked  Definitely True  Mostly True  Don't Know   
Mostly False  Definitely False

- b. Dialysis staff support me in coping with my kidney disease
- Definitely True  Unchecked  Mostly True  Don't Know
- Mostly False  Definitely False

**BACKGROUND INFORMATION**

25. Do you currently take prescription medications regularly (4 or more days a week) that are prescribed by your doctor for a medical condition? Please don't count over the counter medications like antacids or aspirin. If "No" please skip to Question 3.

No:  Yes:

1.a. How many different prescription medications do you currently take? Number of Medications:

26. How many days total in the last 6 months did you stay in any hospital overnight or longer?(if none, please write in 0)  days

27. How many days total in the last 6 months did you receive care at a hospital, but came home the same day? (if none, please write in 0)  days

28. What caused your kidney disease?

Don't know:  Hypertension (High Blood Pressure)  Diabetes

Polycystic Kidney Disease  Chronic Glomerulonephritis  Chronic Pyelonephritis

Other (please specify)

29. When were you born: \_\_/ \_\_/ \_\_\_\_

30. What is the highest level of school you have completed?

8th grade or less  some high school or less  High school diploma  Vocational school or some college  College degree  Professional or graduate degree

31. What is your gender?

Male  Female

32. Are you currently married

No  Yes

33. During the last 30 days, were you:

1. working full-time  2. Working part-time  3. Unemployed, laid off, or looking for work  
 4. Retired  5. Disabled  6. In School  7. Keeping house  8. None of the  
above

34. What was your total household income (from all sources) before taxes in the LAST CALENDAR YEAR, including yourself, your partner, and others you regard as family who live in your household?

(Please remember your answers are confidential)  MK

35. Did someone help you fill out this survey?

YES  NO

36. What is today's date?: \_\_/\_\_/\_\_\_\_

Time:

37. How long have you been on dialysis? \_\_\_\_\_ months

THANK YOU.

## 13.2. KDQOL SF-36 AMMENDMENTS

### REMOVED QUESTIONS

14. During the past 4 weeks, to what extent were you bothered by each of the following?  
(Peritoneal dialysis only)

m. problems with your catheter site?

m. Unchecked  Not at all bothered  Somewhat bothered  Moderately bothered  
 Very Much Bothered  Extremely Bothered

32. how do you describe yourself?

African American or Black  Hispanic or Latino  Native American or American  
Indian  Asian or Pacific islander  white  other  (please specify

35. What kind of health insurance do you have?

### MODIFIED QUESTIONS

36. What was your total household income (from all sources) before taxes in the LAST CALENDAR YEAR, including yourself, your partner, and others you regard as family who live in your household? (Please remember your answers are confidential)  US\$

TO

34. What was your total household income (from all sources) before taxes in the LAST CALENDAR YEAR, including yourself, your partner, and others you regard as family who live in your household? (Please remember your answers are confidential)  MK

3. The following items are about activities you might do during a typical day. Does your health now limit you in these activities? If so, how much?

b. **Moderate activities**, such as moving a table, pushing a vacuum cleaner, bowling, or playing golf

Unchecked  yes, limited a Lot  yes, limited a little  No, not limited at all

TO

3. The following items are about activities you might do during a typical day. Does your health now limit you in these activities? If so, how much?

b. **Moderate activities**, such as moving a table, mopping and sweeping

Unchecked  yes, limited a Lot  yes, limited a little  No, not limited at all

3. The following items are about activities you might do during a typical day. **Does your health now limit** you in these activities? If so, how much?

g. Walking **more than a mile**,

Unchecked  yes, limited a Lot  yes, limited a little  No, not limited at all

TO

3. The following items are about activities you might do during a typical day. **Does your health now limit** you in these activities? If so, how much?

g. Walking **more than a kilometer**,

Unchecked  yes, limited a Lot  yes, limited a little  No, not limited at all

9. These questions are about how you feel and how things have been with you during the past 4 weeks. For each question, please give the one answer that comes closest to the way you have been feeling.

How much of the time during the past 4 weeks

**a. Did you feel full of pep?**

Unchecked  All of the time  Most of the time  A good bit of the time   
Some of the time  A little of the time  None of the time

TO

9. These questions are about how you feel and how things have been with you during the past 4 weeks. For each question, please give the one answer that comes closest to the way you have been feeling.

How much of the time during the past 4 weeks

**a. Did you feel high spirited?**

Unchecked  All of the time  Most of the time  A good bit of the time   
Some of the time  A little of the time  None of the time
